# Supplementary material for: Capacity for survival in global warming: Adaptation of mesophiles to the temperature upper limit
Source: PubMed Central journal article supplement (PMC6504187; doi:10.1371/journal.pone.0215614), 2019-05-07

A

37 °C

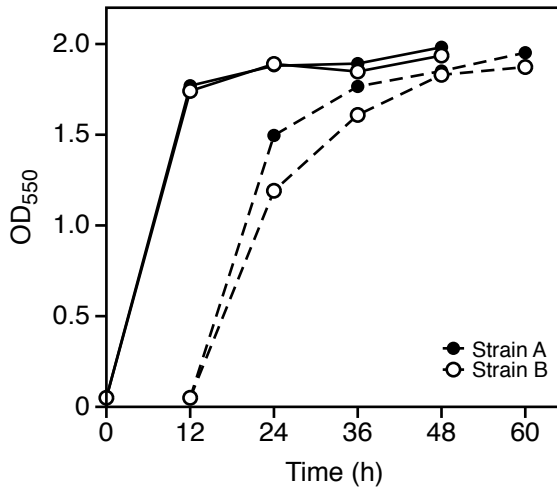

B

38 °C

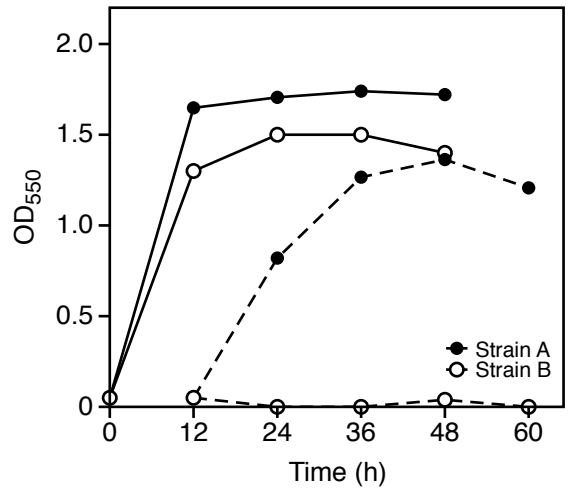

Supplement: pone.0215614.s001.pdf [file pone.0215614.s001.pdf]
