# Supplementary material for: Capacity for survival in global warming: Adaptation of mesophiles to the temperature upper limit
Source: PubMed Central journal article supplement (PMC6504187; doi:10.1371/journal.pone.0215614), 2019-05-07

**A**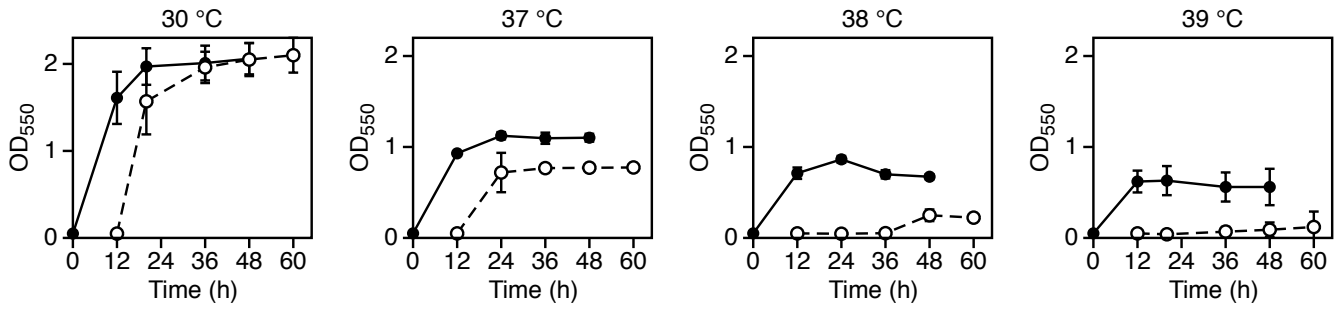**B**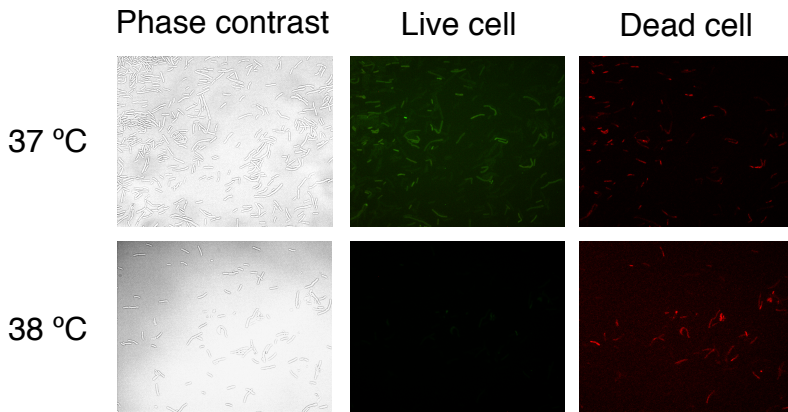**C**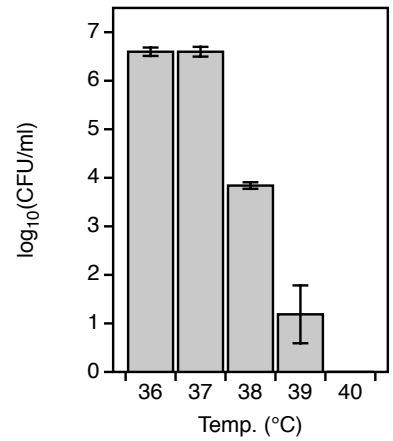

Supplement: pone.0215614.s002.pdf [file pone.0215614.s002.pdf]
