# Supplementary material for: Capacity for survival in global warming: Adaptation of mesophiles to the temperature upper limit
Source: PubMed Central journal article supplement (PMC6504187; doi:10.1371/journal.pone.0215614), 2019-05-07
Supplement: pone.0215614.s007.pdf [file pone.0215614.s007.pdf]

**S1 Table. Summary of mutations in thermo-adapted mutants from *Zymomonas mobilis* TISTR548.**

| Locus tag | Gene | Classification             | Product                                                      | Position        | Reference | Alteration | Mutation     | Amino acid change                      | Mutant |      |
|-----------|------|----------------------------|--------------------------------------------------------------|-----------------|-----------|------------|--------------|----------------------------------------|--------|------|
|           |      |                            |                                                              |                 |           |            |              |                                        | 200M   | MAS1 |
| -         |      |                            | -                                                            | 97242-97307     |           |            | Tn insertion |                                        | +      | +    |
| ZZ6_0121  |      | Transcriptional regulation | DEAD/DEAH box helicase domain protein                        | 130315          | C         | T          | Transition   | Gly110Arg                              |        | +    |
| -         |      |                            | -                                                            | 396944          | C         | G          | Transversion |                                        | +      | +    |
| ZZ6_0448  |      | Transporter                | sodium/hydrogen exchanger                                    | 513196          | G         | A          | Transition   | Val242Ile                              | +      | +    |
| ZZ6_0464  |      | Membrane stabilization     | Phospho-N-acetylmuramoyl-pentapeptide- transferase           | 536297          | C         | T          | Transition   | Val179Met                              | +      | +    |
| ZZ6_0695  |      | Transporter                | Taurine-transporting ATPase                                  | 799465          | C         | T          | Transition   | Met417Ile                              | +      | +    |
| ZZ6_0717  |      | Transcriptional regulation | signal transduction histidine kinase                         | 827096-827129   |           |            | Tn insertion | Split (Tn): aa14stop                   | +      | +    |
| ZZ6_0765  |      | Membrane stabilization     | GtrA family protein                                          | 868056-868086   |           |            | Tn insertion | Split (Tn) aa18stop                    | +      | +    |
| ZZ6_0806  |      | General metabolism         | Formate--tetrahydrofolate ligase                             | 921574          | C         | T          | Transition   | Ser492Phe                              | +      | +    |
| ZZ6_0951  |      | Others                     | protein of unknown function DUF1239                          | 1087369         | C         | CTAT       | InDel        | ATT insert as Ile in the next of Ala36 | +      | +    |
| -         |      |                            | -                                                            | 1091424         | GCCCCC    | GCCCCC     | InDel        |                                        | +      | +    |
| -         |      |                            | -                                                            | 1091426         | C         | G          | Transversion |                                        | +      | +    |
| -         |      |                            | -                                                            | 1091427         | C         | G          | Transversion |                                        | +      | +    |
| -         |      |                            | -                                                            | 1091643         | GA        | G          | InDel        |                                        | +      | +    |
| ZZ6_0986  |      | Membrane stabilization     | polysaccharide biosynthesis protein                          | 1124869         | C         | T          | Transition   | Trp209Stop                             | +      | +    |
| -         |      |                            | -                                                            | 1141264         | T         | A          | Transversion |                                        | +      | +    |
| ZZ6_1055  |      | General metabolism         | pyruvate kinase                                              | 1210347         | A         | G          | Transition   | Met286Val                              |        | +    |
| -         |      |                            | -                                                            | 1235528         | G         | A          | Transition   |                                        | +      | +    |
| -         |      |                            | -                                                            | 1285391-1285441 |           |            | Tn insertion | Split (Tn)                             | +      | +    |
| ZZ6_1230  |      | Protein quality control    | thiol-disulfide isomerase                                    | 1405792         | TG        | T          | InDel        | Leu67fs: aa80stop                      | +      | +    |
| ZZ6_1423  |      | Transcriptional regulation | TonB-dependent receptor                                      | 1611478-1611516 |           |            | Tn insertion | Split (Tn)                             | +      | +    |
| ZZ6_1572  |      | Transcriptional regulation | TonB-dependent receptor                                      | 1798985-1799049 |           |            | Tn insertion | Split (Tn)                             | +      | +    |
| ZZ6_1657  |      | Protein quality control    | ATP-dependent chaperone ClpB                                 | 1893769         | G         | A          | Transition   | Pro774Leu                              |        | +    |
| ZZ6_1692  |      | Transcriptional regulation | two component transcriptional regulator, winged helix family | 1935128         | CCCCAAAG  | C          | InDel        | Gly92fs: aa97stop                      | +      | +    |
