# Supplementary material for: Capacity for survival in global warming: Adaptation of mesophiles to the temperature upper limit
Source: PubMed Central journal article supplement (PMC6504187; doi:10.1371/journal.pone.0215614), 2019-05-07
Supplement: pone.0215614.s008.pdf [file pone.0215614.s008.pdf]

**S2 Table. Summary of mutations in thermoadapted mutants from *Zymomonas mobilis* CP4.**

| Locus tag | Gene | Classification             | Product                                                                                           | Position   | Reference | Alteration           | Mutation   | Amino acid change | Mutant |        |        |        |
|-----------|------|----------------------------|---------------------------------------------------------------------------------------------------|------------|-----------|----------------------|------------|-------------------|--------|--------|--------|--------|
|           |      |                            |                                                                                                   |            |           |                      |            |                   | Z4-80a | Z4-80b | Z4-80c | Z4-80d |
| ZCP4_0028 |      | Transcriptional regulation | signal transduction histidine kinase                                                              | 32323      | C         | T                    | Transition | Met99Ile          |        | +      |        |        |
| -         |      |                            | -                                                                                                 | 98768      | G         | GATGCCAGA            | InDel      |                   |        |        |        | +      |
| ZCP4_0125 |      | Transporter                | K+ transporter                                                                                    | 142649     | A         | G                    | Transition | Thr403Ala         | +      |        |        |        |
| ZCP4_0125 |      | Transporter                | K+ transporter                                                                                    | 143231     | C         | T                    | Transition | Arg597Cys         |        |        | +      |        |
| ZCP4_0567 |      | Transcriptional regulation | DNA-directed RNA polymerase subunit                                                               | 648575     | G         | A                    | Transition | Arg164Cys         | +      |        | +      |        |
| ZCP4_0588 |      | General metabolism         | formyltetrahydrofolate-dependent phosphoribosylglycinamide formyltransferase                      | 670742     | C         | T                    | Transition | Leu118Phe         |        |        |        | +      |
| ZCP4_0707 |      | Transporter                | ABC-type nitrate/sulfonate/bicarbonate transport system, ATPase component                         | 799915     | G         | A                    | Transition | Pro438Leu         | +      |        |        |        |
| -         |      |                            | -                                                                                                 | 1205885    | T         | TCAGGTCGC            | InDel      |                   |        |        |        | +      |
| -         |      |                            | -                                                                                                 | 1205931    | T         | TCGCAGGTCG           | InDel      |                   |        |        |        | +      |
| -         |      |                            | -                                                                                                 | 1714424    | TTATT     | TT                   | InDel      |                   |        |        |        | +      |
| -         |      |                            | -                                                                                                 | 1714426    | A         | AGGCT                | InDel      |                   |        |        | +      |        |
| -         |      |                            | -                                                                                                 | 1714428    | TC        | TCTC                 | InDel      |                   |        |        | +      | +      |
| ZCP4_1646 |      | General metabolism         | 1-(5-phosphoribosyl)-5-((5-phosphoribosylamino)methylideneamino)imidazole-4-carboxamide isomerase | 1856048    | A         | ATTTATGACG<br>GCTCAC | InDel      | IYDGSL insertion  |        |        | +      |        |
| ZCP4_1702 |      | Transporter                | RND family efflux transporter, subunit                                                            | MFP1926213 | G         | A                    | Transition | Glu136Lys         | +      |        |        |        |
| ZCP4_1702 |      | Transporter                | RND family efflux transporter, subunit                                                            | MFP1926238 | C         | T                    | Transition | Thr144Met         |        |        |        | +      |
| ZCP4_1703 |      | Transporter                | efflux transporter, outer membrane factor lipoprotein, NodT family                                | 1928285    | A         | G                    | Transition | Lys462Glu         |        |        |        | +      |
| ZCP4_1739 |      | Membrane stabilization     | sphingosine/diacylglycerol kinase-like enzyme                                                     | 1966395    | C         | T                    | Transition | Ala89Val          | +      |        |        |        |
| ZCP4_1739 |      | Membrane stabilization     | sphingosine/diacylglycerol kinase-like enzyme                                                     | 1966601    | C         | T                    | Transition | Leu158Phe         |        |        |        | +      |
| ZCP4_1739 |      | Membrane stabilization     | sphingosine/diacylglycerol kinase-like enzyme                                                     | 1966796    | G         | A                    | Transition | Val223Met         |        |        | +      |        |
