# Supplementary material for: Capacity for survival in global warming: Adaptation of mesophiles to the temperature upper limit
Source: PubMed Central journal article supplement (PMC6504187; doi:10.1371/journal.pone.0215614), 2019-05-07
Supplement: pone.0215614.s009.pdf [file pone.0215614.s009.pdf]

**S3 Table. Summary of mutations in thermoadapted mutants from *Escherichia coli* W3110.**

| Locus_tag | Gene | Classification             | Product                                                                        | Position    | Reference Alteration |     | Mutation     | Amino acid change | Mutant |      |
|-----------|------|----------------------------|--------------------------------------------------------------------------------|-------------|----------------------|-----|--------------|-------------------|--------|------|
|           |      |                            |                                                                                |             | ce                   | ion |              |                   | Im2B   | Im4B |
| Y75_p0796 | ybiW | General metabolism         | pyruvate formate lyase                                                         | 861430      | A                    | G   | Transition   |                   | +      |      |
| -         | -    |                            | -                                                                              | 987574      | G                    | T   | Transversion |                   |        | +    |
| Y75_p0997 | ycdT | Membrane stabilization     | diguanylate cyclase                                                            | 1093686     | T                    | C   | Transition   | Val130Ala         |        | +    |
| -         | -    |                            | -                                                                              | 1097560     | TC                   | T   | InDel        |                   |        | +    |
| -         | -    |                            | -                                                                              | 1097741     | TC                   | T   | InDel        |                   | +      |      |
| -         | -    |                            | -                                                                              | 2866111     | A                    | G   | Transition   |                   |        | +    |
| Y75_p2745 | gcvA | Transcriptional regulation | DNA-binding transcriptional regulator                                          | dual2940893 | GA                   | G   | InDel        | Pro111fs          |        | +    |
| Y75_p3209 | rpoC | Transcriptional regulation | RNA polymerase, beta prime subunit                                             | 3449152     | T                    | G   | Transversion | Asp727Ala         | +      |      |
| Y75_p3236 | pflC | General metabolism         | pyruvate formate lyase II activase                                             | 3490291     | T                    | TA  | InDel        | Lys45fs           |        | +    |
| Y75_p3311 | ompL | Membrane stabilization     | outer membrane porin L                                                         | 3572737     | T                    | C   | Transition   | Phe118Leu         |        | +    |
| Y75_p3331 | trkH | Transporter                | potassium transporter                                                          | 3603496     | A                    | T   | Transversion | Val14Asp          |        | +    |
| Y75_p3524 | spoT | Transcriptional regulation | bifunctional (p)ppGpp synthetase II and 3'-guanosine-3',5'-bis pyrophosphatase | 3816251     | C                    | T   | Transition   | Gly589Ser         |        | +    |
| Y75_p3524 | spoT | Transcriptional regulation | bifunctional (p)ppGpp synthetase II and 3'-guanosine-3',5'-bis pyrophosphatase | 3817018     | A                    | G   | Transition   | Met333Thr         | +      |      |
| -         | -    |                            | -                                                                              | 4371270     | GAA                  | G   | InDel        |                   | +      |      |
| -         | -    |                            | -                                                                              | 4375299     | A                    | C   | Transversion |                   | +      |      |
