# Supplementary material for: Capacity for survival in global warming: Adaptation of mesophiles to the temperature upper limit
Source: PubMed Central journal article supplement (PMC6504187; doi:10.1371/journal.pone.0215614), 2019-05-07
Supplement: pone.0215614.s010.pdf [file pone.0215614.s010.pdf]

**S4 Table. Primers used for construction of mutators.**

| Primer name  | Sequence (5'→3')                                      | Purpose         |
|--------------|-------------------------------------------------------|-----------------|
| F-mutS-up    | GGGGACAAGTTTGTACAAAAAAGCAGGCTCGGCTGTGCTTGCTCGCTAATC   | gene disruption |
| F-mutS-down  | GGGGGGGGGGGGGAAGATCGGCTGTCAGAAGGC                     | gene disruption |
| R-mutS-up    | CCCCCCCCCCCCCTCAAGGTCGTCATCCCGTTG                     | gene disruption |
| R-mutS-down  | GGGGACCACTTTGTACAAGAAAGCTGGGTCAGTCACGACAGAAGGCGTTT    | gene disruption |
| F-mutL-up    | GGGGACAAGTTTGTACAAAAAAGCAGGCTCGGTGGGGCTATTTCCGGCTTAAA | gene disruption |
| F-mutL-down  | GGGGGGGGGGGGGGCTTCTCCAGCTGCGATACGATT                  | gene disruption |
| R-mutL-up    | CCCCCCCCCCCCCATGGGTAAAGCTCGGCCATAAA                   | gene disruption |
| R-mutL-down  | GGGGACCACTTTGTACAAGAAAGCTGGGTCGGCCATCCCAAATTAGACCGTT  | gene disruption |
| F-mutS2-up   | GGGGACAAGTTTGTACAAAAAAGCAGGCTCGATGTAGCGGCTGTCCTGATG   | gene disruption |
| F-mutS2-down | CCCCCCCCCCCCCTGAGCAAGTCAGCCAAGGAT                     | gene disruption |
| R-mutS2-up   | GGGGGGGGGGGGGGTGTGATCCTTCGTCGTCGTC                    | gene disruption |
| R-mutS2-down | GGGGACCACTTTGTACAAGAAAGCTGGGTCTAGGAAACAGCCTGCCAAGG    | gene disruption |
