# Supplementary material for: Capacity for survival in global warming: Adaptation of mesophiles to the temperature upper limit
Source: PubMed Central journal article supplement (PMC6504187; doi:10.1371/journal.pone.0215614), 2019-05-07
Supplement: pone.0215614.s011.pdf [file pone.0215614.s011.pdf]

**S5 Table. List of sequencing data and platform used in this study.**

| Strain    | Reference strain                                  | BioProject accession | DRA accession | BioSample accession | Sequence platform   |
|-----------|---------------------------------------------------|----------------------|---------------|---------------------|---------------------|
| CP4       | <i>Zymomonas mobilis</i> subsp. mobilis CP4       | PRJDB7156            | DRA007031     | SAMD00129443        | Illumina MiSeq      |
| Z4-80a    | <i>Zymomonas mobilis</i> subsp. mobilis CP4       | PRJDB7156            | DRA007032     | SAMD00129444        | Illumina MiSeq      |
| Z4-80b    | <i>Zymomonas mobilis</i> subsp. mobilis CP4       | PRJDB7156            | DRA007033     | SAMD00129445        | Illumina Miseq      |
| Z4-80c    | <i>Zymomonas mobilis</i> subsp. mobilis CP4       | PRJDB7156            | DRA007034     | SAMD00129446        | Illumina Hiseq 2500 |
| Z4-80d    | <i>Zymomonas mobilis</i> subsp. mobilis CP4       | PRJDB7156            | DRA007035     | SAMD00129447        | Illumina Hiseq 2500 |
| TISTR 548 | <i>Zymomonas mobilis</i> subsp. mobilis TISTR 548 | PRJDB7157            | DRA007036     | SAMD00129448        | Illumina Hiseq 2500 |
| 200M      | <i>Zymomonas mobilis</i> subsp. mobilis TISTR 548 | PRJDB7157            | DRA007037     | SAMD00129449        | Illumina Hiseq 2500 |
| MAS1      | <i>Zymomonas mobilis</i> subsp. mobilis TISTR 548 | PRJDB7157            | DRA007038     | SAMD00129450        | Illumina Hiseq 2500 |
| W3110     | <i>Escherichia coli</i> str. K-12 substr. W3110   | PRJDB7158            | DRA007039     | SAMD00129451        | Ion Torrent PGM     |
| Im2B      | <i>Escherichia coli</i> str. K-12 substr. W3110   | PRJDB7158            | DRA007040     | SAMD00129452        | Ion Torrent PGM     |
| Im4B      | <i>Escherichia coli</i> str. K-12 substr. W3110   | PRJDB7158            | DRA007041     | SAMD00129453        | Ion Torrent PGM     |
