# Supplementary material for: Capacity for survival in global warming: Adaptation of mesophiles to the temperature upper limit
Source: PubMed Central journal article supplement (PMC6504187; doi:10.1371/journal.pone.0215614), 2019-05-07
Supplement: pone.0215614.s012.pdf [file pone.0215614.s012.pdf]

**S6 Table Primers used for confirmation of mutation sites in coding regions of thermoadapted mutants from *Z. mobilis* TISTR548.**

| Primer name         | Sequence               | Target gene:Mutation position |
|---------------------|------------------------|-------------------------------|
| ZM548bs11105-Right  | GCAGATTCCGCCAAGATG     | ZZ6_0207:229843               |
| ZM548bs11105-left   | TGCAAGCCTACCTTTCCC     | ZZ6_0207:229843               |
| 200M_335321-1F      | GCCAACGTCAGGCCTTGA     | ZZ6_0294:335321               |
| 200M_335321-1R      | TCGAGAACC GGCGTATCG    | ZZ6_0294:335321               |
| ZM548bs10836-Right  | ATGCTCTTCCATCGGC       | ZZ6_0448:513196               |
| ZM548bs10836-left   | GTGGCCAATTTTCGCAAG     | ZZ6_0448:513196               |
| 200M_536297-01F     | CCGATAATCGCCCCGTC      | ZZ6_0464:536297               |
| 200M_536297-01R     | TCGCGGTCTCTATCTCGCT    | ZZ6_0464:536297               |
| ZM548bs10576-Right  | TCCGGTGACAATAGGCGT     | ZZ6_0695:799465               |
| ZM548bs10576-left   | GCTGACCTCCCCATCTT      | ZZ6_0695:799465               |
| ZM548bs10553-Right  | CATGGAACCGGAATTTGC     | ZZ6_0717:827096               |
| ZM548bs10553-left   | AGCGCTAAAGGGATTGCC     | ZZ6_0717:827096               |
| ZM548bs10503-Right  | AAACCCAGCGACGATTCA     | ZZ6_0765:868056               |
| ZM548bs10503-left   | AGGCGGAGATTGTCATCG     | ZZ6_0765:868056               |
| 200M_898967-01F     | ACCAGTGCGACAATCAGCT    | ZZ6_0785:898945               |
| 200M_898967-01R     | CGATGTTGGTTGAATCCGGT   | ZZ6_0785:898945               |
| 200M_921574-01F     | CAGGATCTTTCGCCTCGA     | ZZ6_0806:921574               |
| 200M_921574-01R     | TATTTTCGGCGGGGAT       | ZZ6_0806:921574               |
| ZM548bsIG6-Right    | ACCTTTAGACGACGGGGC     | ZZ6_0850:964578               |
| ZM548bsIG6-Left     | TGGGCTTCTTGTCTGCC      | ZZ6_0850:964578               |
| ZM548bs10288-Right  | GCACCCGTCTATTGCACC     | ZZ6_0951:1087369              |
| ZM548bs10288-left   | CATCCATAACGGCCTTGC     | ZZ6_0951:1087369              |
| ZM548bs10250-Right  | ATTGGTTTTGGGGCAAT      | ZZ6_0986:1124869              |
| ZM548bs10250-left   | GGCGTATCTATGGTGCCG     | ZZ6_0986:1124869              |
| pyruvate sequence F | AGACGTCATCGAAGCCAAAG   | ZZ6_1055:1210347              |
| pyruvate sequence R | GGTTTCGGTGAAGACGATGA   | ZZ6_1055:1210347              |
| ZM548bs11855-Right  | TTCCGGAACAGAATCCGA     | ZZ6_1230:1405792              |
| ZM548bs11855-left   | ATTAGCTCCCTGTCGGGC     | ZZ6_1230:1405792              |
| 200M_1611502-01F    | ATGACCCCGGGGACTTCT     | ZZ6_1423:1611478              |
| 200M_1611502-01R    | TTCTTACCCAGCCGCG       | ZZ6_1423:1611478              |
| ZM548bs11481-Right  | CATAATGGGTAAACGCGGC    | ZZ6_1572:1798985              |
| ZM548bs11481-left   | TGGAGGCATTGTCGAAGG     | ZZ6_1572:1798985              |
| ClpB sequence R     | GTCTGACCATCACGAATAGTGC | ZZ6_1657:1893769              |
| ClpB sequence F     | GGGTCGGACAGTTGATTTTCC  | ZZ6_1657:1893769              |
| ZM548bs11361-Right  | TAAACCCACTCGCAACGG     | ZZ6_1692:1935128              |
| ZM548bs11361-left   | CATGGAATGCTGGCTTTCTT   | ZZ6_1692:1935128              |
