# Supplementary material for: Capacity for survival in global warming: Adaptation of mesophiles to the temperature upper limit
Source: PubMed Central journal article supplement (PMC6504187; doi:10.1371/journal.pone.0215614), 2019-05-07
Supplement: pone.0215614.s013.pdf [file pone.0215614.s013.pdf]

**S7 Table Primers used for confirmation of mutation sites in coding regions of thermoadapted mutants from *Z. mobilis* CP4.**

| Primer name   | Sequence              | Target gene:Mutation position |
|---------------|-----------------------|-------------------------------|
| ZCP4_0028_F   | GCCATTCATTCTGGCTACG   | ZCP4_0028:32323               |
| ZCP4_0028_R   | ATACCGCCTATCAGGATGATG | ZCP4_0028:32323               |
| ZCP4_0039_F   | CGTTGCAGAATCTGGTCTTG  | ZCP4_0039:44175               |
| ZCP4_0039_R   | CGAATGTCCATAAAAGCGACG | ZCP4_0039:44175               |
| ZCP4_0125_1_F | GTGTGCCGTTGATTATTCTCG | ZCP4_0125:142649              |
| ZCP4_0125_R   | GGGATAAGTGTCTGACGAGAG | ZCP4_0125:142649              |
| ZCP4_0125_2_F | ATGGCTTCTATCGCCTGATC  | ZCP4_0125:143231              |
| ZCP4_0125_2R  | CGGAGATTGGTCTCTAGTGG  | ZCP4_0125:143231              |
| ZCP4_0567_F   | CAGCTTTCAGCGACATAAAGG | ZCP4_0567:648575              |
| ZCP4_0567_R   | TGAGGACGGATATGTTTCAGG | ZCP4_0567:648575              |
| ZCP4_0588_F   | AGGATTATATGGCGACCAAGG | ZCP4_0588:670742              |
| ZCP4_0588_R   | GATTCTTTCACCTTCGCTCG  | ZCP4_0588:670742              |
| ZCP4_0707_F   | ACATCGGTTTGGCTTGTTAC  | ZCP4_0707:799915              |
| ZCP4_0707_R   | TTACCTCAGCCCAGAAATCG  | ZCP4_0707:799915              |
| ZCP4_1646_F   | TTCTGTCACTGAGATGGCTG  | ZCP4_1646:1856048             |
| ZCP4_1646_R   | CGGAATTAACGGCGACTTTG  | ZCP4_1646:1856048             |
| ZCP4_1702_1_F | GATGTTTCCGGTTTGGTCAC  | ZCP4_1702:1926213             |
| ZCP4_1702_1_R | CCCATGTAAAGGTTGGGTTG  | ZCP4_1702:1926213             |
| ZCP4_1703_F   | AGCCGCTCTTACAACCTATAC | ZCP4_1703:1928109             |
| ZCP4_1703_R   | CATTCCTGCGTGATCTTGTTT | ZCP4_1703:1928109             |
| ZCP4_1739_F   | AAGAAGAACAGCGAGGGTAC  | ZCP4_1739:1966395             |
| ZCP4_1739_R   | TGCGGATCTTGTGAAACAC   | ZCP4_1739:1966395             |
| ZCP4_1739_F2  | CGACAGCCATATCGTCAAAC  | ZCP4_1739:1966601             |
| ZCP4_1739_R   | TCAGGCCATCAAGATCAGTC  | ZCP4_1739:1966601             |
