# Supplementary material for: Capacity for survival in global warming: Adaptation of mesophiles to the temperature upper limit
Source: PubMed Central journal article supplement (PMC6504187; doi:10.1371/journal.pone.0215614), 2019-05-07
Supplement: pone.0215614.s014.pdf [file pone.0215614.s014.pdf]

**S8 Table Primers used for confirmation of mutation sites in coding regions of thermoadapted mutants from *E. coli* W3110.**

| Primer name     | Sequence                  | Target gene:Mutation position |
|-----------------|---------------------------|-------------------------------|
| ybiW_861430-F1  | TCATCGTCGTTGCCGTAC        | Y75_p0796:861430              |
| ybiW_861430-R1  | GGTGGCAAATGGGGCTAT        | Y75_p0796:861430              |
| ycdT_1093686-F1 | AGGCGTTGAGGAAGTTGTT       | Y75_p0997:1093686             |
| ycdT_1093686-R1 | ACCGAAAGCAAGTTAACCA       | Y75_p0997:1093686             |
| ydgH-2seq-L     | GGCGGTCACTCAATTAACGA      | Y75_p2732:2925784             |
| ydgH-2seq-R     | CAGCGTATGCACGACAACT       | Y75_p2732:2925784             |
| gcvA_2940893-F1 | TTAACCCCAACTGTCGGG        | Y75_p2745:2940893             |
| gcvA_2940893-R1 | CCAAGCCGCAGTAAGTCA        | Y75_p2745:2940893             |
| rpoC_2-L        | TAACCGGAGTCATCAGATACCTTC  | Y75_p3209:3449152             |
| rpoC_2-R        | TTTGCGGACCAGATCATGTACA    | Y75_p3209:3449152             |
| pflC_3490291-F1 | GCCGCAGTCGCTGTAATA        | Y75_p3236:3490291             |
| pflC_3490291-R1 | AACAGCGCCCACAAGATT        | Y75_p3236:3490291             |
| ompL_3572737-F1 | GGGCGCGGGTATTATGTT        | Y75_p3311:3572737             |
| ompL_3572737-R1 | GTGGTACGGTTCGACGTT        | Y75_p3311:3572737             |
| trkH-4seq-L     | AACCCTCACGGGATTTAAGTT     | Y75_p3331:3603496             |
| trkH-4seq-R     | ATCATCAGTTAACCGGCATTGA    | Y75_p3331:3603496             |
| spoT_4-L        | CTGATGATTGAACATCTCCACCTTG | Y75_p3524:3816251             |
| spoT_4-R        | ACCTCAAGCGTGATGATTCTGT    | Y75_p3524:3816251             |
| spoT_2-L        | ATCATCACGCTTGAGGTTTTTCAG  | Y75_p3524:3817018             |
| spoT_2-R        | ACGGCTATCAGTCTTTGCACA     | Y75_p3524:3817018             |
